# Supplementary material for: Breakthrough pressure of oil displacement by water through the ultra-narrow kerogen pore throat from the Young–Laplace equation and molecular dynamic simulations
Source: Royal Society of Chemistry journal article supplement (doi:10.1039/d2cp01643e), 2022-01-01
Supplement: d2cp01643e1.xlsx [file d2cp01643e1.xlsx]

## Sheet: Sheet2
Atom Index		Types		X (Å)		Y (Å)		Z (Å)
1		cp		428.98		19.06		84.66
2		cp		429.81		18.51		85.56
3		cp		429.76		20.48		86.78
4		cp		430.25		19.25		86.59
5		cp		431.07		18.74		87.51
6		cp		430		21.1		87.94
7		c5		430.17		17.23		85.45
8		c5		431.01		16.73		86.44
9		cp		430.89		20.59		88.8
10		cp		431.4		19.36		88.65
11		cp		431.46		17.46		87.48
12		cp		432.17		16.92		88.48
13		cp		432.21		18.88		89.6
14		cp		432.66		17.62		89.51
15		cp		428.49		20.3		84.87
16		c5		431.21		15.38		86.14
17		c5		429.91		16.14		84.61
18		np		430.51		14.97		85.03
19		hn		430.81		14.12		84.54
20		cp		428.98		21.06		85.85
21		h		432.45		19.48		90.47
22		h		431.06		21.21		89.67
23		h		432.6		15.93		88.45
24		h		428.79		18.52		83.75
25		h		431.88		14.72		86.67
26		h		429.35		16.04		83.7
27		h		427.91		20.74		84.07
28		c2		428.63		22.52		85.91
29		c2		429.4		23.29		86.98
30		c1		429.38		22.45		88.25
31		c2		433.56		17.03		90.56
32		c2		434.45		17.82		91.52
33		c2		434.93		16.96		92.69
34		h		433.81		18.61		91.94
35		h		434.09		16.16		90.14
36		h		432.79		16.5		91.15
37		h		428.31		22.18		88.27
38		h		430.41		23.44		86.56
39		h		428.95		24.3		87.07
40		h		427.56		22.63		86.18
41		h		428.88		23.02		84.96
42		cp		429.54		16.61		91.26
43		cp		428.74		17.4		90.54
44		cp		428.21		16.91		89.41
45		cp		428.57		18.69		90.87
46		cp		429.33		19.26		91.81
47		cp		430.17		18.48		92.53
48		cp		430.08		17.15		92.37
49		cp		427.4		17.69		88.68
50		cp		427.78		19.45		90.1
51		cp		427.13		18.96		89.03
52		cp		426.07		20.96		88.86
53		cp		427.64		20.74		90.41
54		cp		428.46		15.66		89.01
55		cp		426.63		17.21		87.69
56		cp		425.7		17.93		87.03
57		cp		425.59		19.23		87.32
58		cp		426.25		19.72		88.37
59		h		425.55		21.67		88.23
60		cp		429.34		20.6		91.94
61		cp		428.5		21.37		91.23
62		cp		429.29		14.91		89.75
63		np		426.69		21.37		89.88
64		cp		429.88		15.37		90.86
65		h		430.72		14.76		91.18
66		c2		428.36		22.87		91.29
67		c2		428.72		23.78		90.12
68		h		429.14		24.77		90.4
69		h		427.92		23.88		89.37
70		h		427.35		23.13		91.66
71		h		428.93		23.4		92.08
72		o		429.79		23.17		89.4
73		cp		426.78		15.91		87.4
74		cp		425.93		15.31		86.56
75		cp		424.86		15.99		86.12
76		c2		423.84		15.1		85.44
77		c2		423.32		15.86		84.23
78		c2		422.73		15.09		83.06
79		c'		423.83		14.52		82.18
80		h		422.08		14.29		83.46
81		h		422.55		16.57		84.58
82		h		424.09		16.48		83.75
83		h		423.05		14.79		86.15
84		h		424.42		14.22		85.09
85		h		426.22		14.3		86.33
86		c2		429.72		13.6		89.14
87		c2		428.74		12.43		88.99
88		c2		427.96		12.12		90.27
89		o		428.94		12.31		91.29
90		c1		428.81		11.61		92.53
91		c2		429.68		12.21		93.63
92		cp		431.59		11.44		92.13
93		h		429.71		11.49		94.47
94		h		429.32		13.15		94.09
95		h		427.75		11.49		92.82
96		h		427.66		11.06		90.17
97		h		427.07		12.78		90.2
98		h		428.13		12.59		88.08
99		h		429.2		11.43		88.85
100		h		430.51		13.15		89.76
101		h		430.17		13.8		88.15
102		c2		431.14		19.13		93.48
103		c1		431.5		20.6		93.23
104		c2		432.26		21.33		94.34
105		h		431.49		21.67		95.06
106		h		432.72		22.28		94.02
107		h		431.98		20.64		92.24
108		h		432.09		18.57		93.4
109		h		430.86		19.04		94.55
110		c2		434.83		18.49		94.63
111		c2		433.33		20.59		95.14
112		s		434.68		20.17		94.02
113		h		432.99		19.65		95.62
114		c1		435.77		17.68		93.74
115		c'		436.25		16.62		94.71
116		c2		437.68		16.1		94.73
117		h		438.17		16.63		95.56
118		h		438.11		16.49		93.79
119		h		436.52		18.45		93.48
120		cp		432.64		7.67		89.28
121		cp		432.69		9.78		90.37
122		cp		433.28		8.77		89.71
123		cp		434.55		8.99		89.33
124		cp		433.38		10.89		90.67
125		c5		433.36		6.74		88.64
126		c5		434.71		6.96		88.39
127		cp		434.49		11.19		89.98
128		cp		435.19		10.16		89.48
129		cp		435.34		8.1		88.73
130		cp		430.87		8.4		90.49
131		c5		435.28		5.79		87.94
132		c5		433.15		5.41		88.3
133		np		434.29		4.84		87.78
134		hn		434.46		3.83		87.73
135		cp		431.47		9.53		90.89
136		cp		430.84		10.41		91.69
137		cp		431.82		13.25		93.59
138		cp		433.09		13.39		93.18
139		cp		433.59		12.53		92.28
140		cp		431.39		7.44		89.7
141		h		436.11		10.27		88.91
142		h		436.41		8.24		88.75
143		h		432.18		4.94		88.27
144		h		431.44		13.83		94.43
145		h		429.89		8.19		90.89
146		c2		436.7		5.65		87.43
147		c2		437.29		4.25		87.53
148		c1		436.91		3.11		86.58
149		c'		438.04		2.1		86.53
150		o'		439.21		2.38		86.79
151		c1		437.88		1.11		85.39
152		c2		439.09		0.18		85.32
153		c1		440.15		0.7		84.35
154		h		440.51		1.62		84.83
155		h		438.7		50.32		84.83
156		h		439.61		50.91		86.24
157		h		437.05		0.37		85.44
158		h		436.06		2.55		87.01
159		h		436.95		3.9		88.52
160		h		437.23		6.28		88.16
161		h		436.73		6.07		86.41
162		cp		440.31		0.63		81.87
163		cp		439.6		0.64		80.73
164		cp		438.26		0.53		80.7
165		cp		439.54		0.71		82.97
166		cp		438.42		0.32		78.42
167		cp		438.25		1.05		82.86
168		cp		437.66		0.34		79.52
169		cp		442.27		0.44		80.76
170		cp		441.64		0.47		81.94
171		cp		442.31		0.27		83.09
172		cp		443.61		0.44		80.77
173		cp		444.29		0.28		81.91
174		cp		443.63		0.06		83.05
175		cp		441.63		0.61		79.59
176		h		445.35		0.28		81.69
177		c5		436.33		0.34		79.35
178		c5		435.55		0.51		80.49
179		np		439.66		0.55		78.49
180		cp		437.51		0.69		81.8
181		cp		436.18		0.66		81.66
182		cp		440.29		0.58		79.58
183		c2		435.41		0.35		78.14
184		c1		433.97		0.12		78.59
185		c2		432.95		1.14		78.11
186		h		432.87		0.94		77.02
187		h		431.97		1.17		78.62
188		h		433.66		50.13		78.4
189		h		435.48		1.37		77.73
190		h		435.69		50.62		77.4
191		h		437.99		0.17		77.44
192		h		442.26		0.47		78.72
193		h		444.27		0.53		79.92
194		h		435.58		0.67		82.57
195		c2		444.48		50.69		84.23
196		c2		445.51		0.74		84.48
197		c3		445.86		1.12		85.91
198		h		446.14		0.16		86.39
199		h		446.8		1.67		86.11
200		h		446.46		0.53		83.95
201		h		445.25		1.68		83.96
202		h		443.96		50.39		85.16
203		o		433.44		2.48		78.14
204		c2		432.59		3.4		78.82
205		c2		433.24		4.76		79.06
206		c1		434.38		4.67		80.07
207		c2		435.7		4.01		79.7
208		h		435.96		4.18		78.64
209		h		435.88		2.95		79.95
210		h		433.99		4.15		80.96
211		h		433.77		4.99		78.12
212		h		432.58		5.63		79.22
213		h		431.68		3.64		78.23
214		h		432.18		2.93		79.73
215		cp		438.09		7.47		84.33
216		cp		438.55		6.43		83.63
217		cp		437.02		8.08		83.78
218		cp		439.35		8.07		88.24
219		cp		439.95		8.48		89.37
220		cp		441.19		8.04		89.65
221		cp		438.01		5.95		82.5
222		cp		436.33		7.54		82.77
223		cp		436.81		6.45		82.16
224		cp		439.67		5.84		84.09
225		cp		438.56		4.94		81.81
226		cp		437.87		4.38		80.8
227		c5		436.65		4.85		80.51
228		c5		436.04		5.85		81.25
229		h		438.93		9.86		86.62
230		cp		440.15		6.24		85.28
231		cp		439.6		7.21		86.03
232		cp		439.82		4.56		82.08
233		cp		440.23		4.91		83.31
234		cp		441.24		5.59		85.73
235		cp		441.77		4.54		85.07
236		cp		441.2		4.2		83.91
237		cp		440.03		7.43		87.28
238		cp		441.22		6.92		87.64
239		cp		441.75		5.91		86.93
240		c2		442.9		3.69		85.6
241		h		443.92		4.09		85.41
242		h		442.89		2.61		85.36
243		cp		438.73		8		85.39
244		h		441.69		3.36		83.43
245		h		435.43		8.02		82.41
246		h		438.17		3.58		80.13
247		c2		440.75		4.03		81.01
248		c3		441.04		5.27		80.17
249		h		441.48		6.02		80.84
250		h		440.21		3.46		80.23
251		c1		442.61		3.65		87.1
252		o		443.63		2.93		87.78
253		c2		443.39		1.83		88.66
254		c2		444.28		1.92		89.89
255		c2		445.52		2.77		89.62
256		h		445.22		3.78		89.28
257		h		446.13		2.39		88.78
258		h		443.77		2.44		90.72
259		h		444.37		0.88		90.27
260		h		443.57		0.88		88.12
261		h		442.34		1.81		89.01
262		cp		443.13		11.76		86.75
263		cp		443.06		11.64		88.09
264		c5		441.73		11.98		90.03
265		cs		440.44		12.19		90.42
266		c5		441.88		11.98		88.64
267		cs		440.73		12.3		87.99
268		sp		439.42		12.46		89.08
269		cp		442.74		11.92		90.9
270		cp		442.53		12		92.22
271		c2		443.69		11.93		93.19
272		h		443.56		12.24		94.24
273		h		444.5		12.59		92.83
274		c1		444.29		10.53		93.23
275		c1		445.62		8.11		94.07
276		c2		446.01		7.42		92.77
277		c3		451.36		3.89		96.69
278		c2		450.07		3.09		96.78
279		cp		448.6		50.74		91.97
280		cp		448.04		50.78		90.75
281		cp		446.98		1.78		91.35
282		cp		447.18		0.73		90.54
283		cp		446.25		2.83		90.95
284		cp		449.39		49.72		92.33
285		c5		450.13		49.86		93.44
286		c5		450.13		0.01		94.14
287		c5		450.89		50.93		95.29
288		c5		451.07		49.09		94.1
289		np		451.41		49.65		95.32
290		c2		451.37		47.71		93.56
291		c1		450.08		47.28		92.88
292		c2		450.37		45.96		92.16
293		c3		450.5		44.76		93.09
294		h		451.53		44.62		93.45
295		h		450.19		43.85		92.54
296		h		451.34		45.99		91.63
297		h		451.57		47.01		94.4
298		h		452.22		47.72		92.85
299		hn		452.08		49.34		96.02
300		h		446.76		0.65		89.54
301		cp		450.05		1.96		95.77
302		h		449.62		45.63		91.42
303		h		449.23		47.1		93.56
304		h		449.1		3.61		96.88
305		h		450.26		2.53		97.71
306		h		451.61		4.38		95.73
307		h		452.19		3.27		97.07
308		h		447.06		7.58		92.45
309		h		445.02		1.66		86.38
310		cp		440.27		12.12		91.75
311		cp		441.27		12.15		92.64
312		cp		432.83		11.62		91.66
313		cp		440.82		12.34		86.65
314		cp		442.02		12.12		86.09
315		h		442.08		12.18		85.01
316		h		439.97		12.58		86.03
317		h		434.67		12.63		92.22
318		cp		449.32		1.02		93.78
319		cp		448.51		0.79		92.73
320		cp		447.74		1.85		92.45
321		cp		447.75		2.96		93.21
322		c5		446.21		3.93		91.72
323		c5		447.02		4.02		92.85
324		cp		448.51		3.02		94.31
325		cp		449.38		2.06		94.62
326		h		448.5		3.93		94.9
327		c2		448.44		50.15		89.44
328		c2		449.19		0.1		88.56
329		c3		450.62		0.24		89.09
330		h		451.18		0.57		88.2
331		h		451.1		50.36		89.44
332		h		450.68		1.06		89.82
333		h		449.16		50.83		87.5
334		h		447.56		49.72		88.92
335		h		433.92		17.87		94.75
336		h		444.13		11.61		86.38
337		h		439.14		9.96		84.8
338		o		443.24		7.47		88.88
339		c2		443.75		8.64		88.25
340		c2		444.25		9.69		89.24
341		c1		444.22		11.18		88.94
342		h		445.18		11.45		88.46
343		h		443.63		9.66		90.16
344		h		445.24		9.39		89.62
345		h		444.53		8.32		87.53
346		h		442.93		9.05		87.63
347		h		435.31		18.55		95.62
348		h		433.71		21.3		95.9
349		cp		424.75		17.31		86.31
350		h		423.85		17.81		85.98
351		h		422.24		15.89		82.48
352		h		435.33		18.29		91.03
353		h		445.44		7.81		91.91
354		h		441.71		5.1		79.31
355		h		441.58		3.37		81.31
356		h		441.59		3.31		87.37
357		h		438.38		4.38		87.6
358		h		448.86		1.15		88.62
359		h		449.15		49.31		89.57
360		c2		438.82		12.26		92.17
361		c1		438.87		13.52		93.03
362		c1		439.6		13.07		94.29
363		c2		441.06		12.73		94.02
364		h		438.03		12.38		91.4
365		h		438.38		11.41		92.7
366		h		439.37		14.35		92.5
367		h		439.05		12.16		94.58
368		h		441.57		13.71		94.02
369		h		441.42		12.11		94.87
370		c2		445.8		10.34		93.14
371		c2		444.15		8.47		94.28
372		c2		446.47		9.38		94.12
373		h		445.85		7.33		94.82
374		h		446.18		11.33		93.44
375		h		446.1		10.15		92.09
376		h		443.8		7.85		95.13
377		h		443.6		8.12		93.39
378		h		446.5		9.71		95.17
379		h		447.54		9.26		93.83
380		h		443.74		10.05		92.39
381		c2		437.5		13.95		93.54
382		c2		439.2		14.18		95.26
383		c1		437.78		14.59		94.9
384		h		436.98		14.56		92.78
385		h		436.86		13.07		93.78
386		h		439.84		15.03		95.55
387		h		439.08		13.68		96.24
388		h		437.18		14.36		95.8
389		o'		435.31		16		95.21
390		h		435.48		16.09		92.29
391		h		434		16.6		93.18
392		cp		450.76		0.89		96.15
393		h		451.11		0.76		97.17
394		o		446.85		5.24		93.45
395		c2		434.92		12.55		89.48
396		h		435.85		12.92		89.95
397		h		434.14		13.31		89.67
398		c3		430.3		6.61		89.05
399		h		430.35		6.66		87.95
400		h		429.3		7.07		89.13
401		h		430.32		5.56		89.39
402		c1		445.74		5.92		92.86
403		h		444.87		5.67		93.51
404		o		443.81		9.85		94.39
405		h		449.89		44.65		94
406		c1		437.08		9.68		85.54
407		c2		436.57		11.1		85.75
408		c1		436.49		9.44		84.15
409		c2		435.03		9.85		84.34
410		c1		435.14		11.08		85.24
411		h		436.73		9.11		86.42
412		h		437.22		11.75		85.13
413		h		436.79		11.26		86.83
414		h		436.99		10.14		83.47
415		h		434.45		9.02		84.79
416		h		434.41		10.18		83.49
417		h		435.01		11.92		84.53
418		c3		424.65		20.16		86.57
419		h		425.26		21		86.18
420		h		424.06		19.73		85.74
421		h		423.92		20.69		87.21
422		o		435.28		12.38		88.11
423		c2		434.26		12.43		87.12
424		c2		434.03		11.17		86.28
425		h		433.32		12.55		87.69
426		h		434.33		13.31		86.46
427		h		433.87		10.16		86.7
428		h		433.06		11.25		85.76
429		h		440.08		5.65		79.78
430		c2		442.78		5.07		87.64
431		h		442.61		4.95		88.73
432		h		443.82		5.42		87.49
433		c2		441.43		50.92		84.24
434		h		441.06		49.88		84.26
435		h		441.93		51.03		85.22
436		c1		437.76		1.84		84.05
437		h		438.55		2.59		84.23
438		c2		429.44		10.25		92.24
439		h		428.75		9.7		91.58
440		h		429.44		9.7		93.19
441		h		451.42		4.74		97.39
442		c2		430.19		21.33		92.95
443		h		430.54		22.31		92.56
444		h		429.64		21.44		93.91
445		c2		434.7		6.07		80.59
446		h		433.98		6.61		81.22
447		h		434.96		6.73		79.75
448		o		427.69		15.1		88.02
449		c3		430.69		16.29		93.45
450		h		431.75		16.1		93.22
451		h		430.23		15.29		93.46
452		h		430.56		16.5		94.53
453		c2		434.09		0.36		80.1
454		h		433.7		1.38		80.28
455		h		433.43		50.67		80.59
456		c2		444.11		11.94		90.26
457		h		444.4		13.01		90.2
458		h		444.9		11.55		90.93
459		c2		436.43		2.58		84.14
460		c2		436.52		3.66		85.21
461		h		435.62		1.87		84.36
462		h		436.13		3.17		83.26
463		h		435.61		4.27		85.11
464		h		437.4		4.28		84.98
465		c2		449.73		48.34		91.84
466		h		448.88		47.87		91.3
467		h		450.56		48.56		91.14
468		c2		445.66		5.31		91.46
469		h		446.28		5.92		90.78
470		h		444.68		5.33		90.95
471		h		445.11		49.79		84.1
472		oh		423.87		15.12		80.95
473		o'		424.72		13.77		82.57
474		ho		424.75		15.16		80.59
475		cp		431.07		12.29		93.03
476		h		433.79		13.99		93.74
477		c2		438.59		9.48		85.64
478		cp		441.88		7.36		88.72
479		h		441.68		8.29		90.58
480		h		439.41		9.06		90.11
481		h		438.38		8.54		88.17
482		cp		437		49.1		92.73
483		cp		438.04		48.86		93.53
484		cp		439		47.53		91.95
485		cp		439.09		48.11		93.15
486		cp		440.14		47.91		93.95
487		cp		440.05		46.82		91.5
488		c5		438.1		49.45		94.73
489		c5		439.21		49.24		95.54
490		cp		441.16		46.7		92.24
491		cp		441.18		47.19		93.48
492		cp		440.26		48.51		95.15
493		cp		441.34		48.31		95.91
494		cp		442.26		47.01		94.26
495		cp		442.36		47.54		95.49
496		cp		436.92		48.51		91.53
497		c5		438.93		49.89		96.74
498		c5		437.14		50.16		95.43
499		np		437.65		50.41		96.69
500		hn		437.07		50.59		97.52
501		cp		437.93		47.71		91.16
502		h		443.02		46.28		94.01
503		h		442.05		46.3		91.78
504		h		441.41		48.89		96.82
505		h		436.24		49.84		92.93
506		h		439.56		49.81		97.61
507		h		436.12		50.38		95.15
508		h		436.02		48.57		90.94
509		c2		437.89		47.16		89.76
510		c2		438.89		46.02		89.56
511		c1		440.15		46.76		90
512		c2		443.51		47.23		96.42
513		c2		444.76		46.39		96.16
514		c2		444.76		44.91		96.57
515		h		445.03		46.62		95.11
516		h		443.17		46.87		97.41
517		h		443.87		48.22		96.76
518		h		440.01		47.75		89.54
519		h		438.65		45.2		90.25
520		h		438.89		45.68		88.51
521		h		438.16		47.92		89
522		h		436.93		46.71		89.46
523		cp		444.55		50.3		93.98
524		cp		443.37		50.37		93.34
525		cp		442.38		0.06		93.87
526		cp		443.22		49.79		92.14
527		cp		444.13		48.9		91.69
528		cp		445.16		48.65		92.51
529		cp		445.5		49.46		93.53
530		cp		441.28		0.36		93.16
531		cp		442.15		50.12		91.4
532		cp		441.23		50.96		91.9
533		cp		440.24		50.8		89.89
534		cp		442.04		49.67		90.14
535		cp		442.45		0.64		95.08
536		cp		440.23		1.05		93.64
537		cp		439.21		1.44		92.87
538		cp		439.15		0.97		91.61
539		cp		440.16		0.23		91.14
540		h		439.53		50.99		89.1
541		cp		443.84		48.23		90.56
542		cp		442.85		48.67		89.76
543		cp		443.63		0.6		95.71
544		np		441.18		50.16		89.35
545		cp		444.65		50.98		95.14
546		h		445.5		50.89		95.79
547		c2		442.58		47.99		88.44
548		c2		441.75		46.72		88.34
549		h		442.2		45.93		87.71
550		h		440.92		46.98		87.66
551		h		442.41		48.81		87.72
552		h		443.56		47.7		88.02
553		o		441.37		46.14		89.58
554		cp		440.26		1.44		94.93
555		cp		439.24		2.1		95.49
556		cp		438.25		2.52		94.69
557		c2		437.16		3.26		95.42
558		c2		437.62		4.68		95.73
559		c2		436.8		5.53		96.69
560		c'		435.41		5.88		96.18
561		h		436.72		5.1		97.7
562		h		438.69		4.76		96
563		h		437.72		5.23		94.77
564		h		436.79		2.8		96.36
565		h		436.28		3.29		94.75
566		h		439.19		2.23		96.57
567		c2		443.8		1.3		97.04
568		c2		444.28		2.75		96.98
569		c2		443.37		3.79		96.32
570		o		443.49		3.89		94.91
571		c1		442.28		4.22		94.23
572		c2		442.4		3.78		92.78
573		cp		440.39		5.3		92.33
574		h		442.58		2.69		92.73
575		h		443.28		4.26		92.33
576		h		441.46		3.68		94.72
577		h		443.54		4.79		96.75
578		h		442.3		3.74		96.59
579		h		444.63		2.97		98.01
580		h		445.17		2.78		96.33
581		h		444.49		0.71		97.67
582		h		442.82		1.32		97.57
583		c2		445.99		47.39		92.35
584		c1		445.29		46.37		91.46
585		c2		446.23		45.24		91.04
586		h		447.22		45.73		90.93
587		h		445.99		44.66		90.14
588		h		444.46		45.97		92.07
589		h		446.4		46.94		93.27
590		h		446.93		47.67		91.83
591		c2		446.2		43.61		94.79
592		c2		446.31		44.13		92.09
593		s		447.02		44.72		93.63
594		h		447.01		43.31		91.83
595		c1		444.83		44		95.35
596		c'		444.09		42.79		95.91
597		c2		442.62		42.72		95.53
598		h		442.46		41.74		95.05
599		h		442.5		43.5		94.76
600		h		444.33		44.5		94.49
601		cp		438.29		9.07		94.48
602		cp		438.75		7.3		93.03
603		cp		437.97		8.31		93.42
604		cp		436.75		8.42		92.87
605		cp		438.41		6.47		92.03
606		c5		437.39		9.94		94.95
607		c5		436.14		10.02		94.35
608		cp		437.11		6.42		91.68
609		cp		436.32		7.43		92.07
610		cp		435.86		9.36		93.22
611		cp		440.27		7.93		94.67
612		c5		435.21		10.71		95.12
613		c5		437.17		10.65		96.13
614		np		435.9		11.19		96.21
615		hn		435.42		11.74		96.93
616		cp		439.89		7.09		93.7
617		cp		440.6		5.97		93.47
618		cp		440.96		3.56		90.91
619		cp		440.05		4.01		90.04
620		cp		439.23		5.02		90.38
621		cp		439.45		8.89		95.13
622		h		435.25		7.4		91.95
623		h		434.9		9.46		92.75
624		h		437.91		10.95		96.85
625		h		441.34		2.56		90.77
626		h		441.17		7.8		95.25
627		c2		433.73		10.42		95.09
628		c2		433.47		9.3		96.09
629		c1		432.31		8.31		96.01
630		c'		432.4		7.32		94.86
631		o'		432.63		7.76		93.73
632		c1		431.21		6.39		95.02
633		c2		431.24		5.22		94.03
634		c1		430.15		4.16		94.19
635		h		429.89		3.74		93.21
636		h		432.25		4.78		94.16
637		h		431.31		5.66		93.02
638		h		431.24		5.88		95.99
639		h		432.34		7.75		96.96
640		h		433.43		9.64		97.14
641		h		433.44		10.21		94.04
642		h		433.14		11.31		95.38
643		cp		427.94		3.93		95.08
644		cp		426.67		4.34		95.15
645		cp		426.43		5.64		94.9
646		cp		428.9		4.81		94.76
647		cp		424.15		5.05		95.11
648		cp		428.7		6.13		94.79
649		cp		425.12		5.95		94.89
650		cp		427.18		1.76		95.32
651		cp		428.2		2.61		95.09
652		cp		429.45		2.11		95.03
653		cp		427.46		0.45		95.39
654		cp		428.72		0.01		95.34
655		cp		429.79		0.81		95.18
656		cp		425.92		2.21		95.47
657		h		428.78		49.98		95.44
658		c5		424.74		7.18		94.53
659		c5		425.77		8.04		94.16
660		np		424.43		3.88		95.49
661		cp		427.42		6.52		94.72
662		cp		427.06		7.76		94.38
663		cp		425.64		3.52		95.42
664		c2		423.42		7.79		94.14
665		c1		423.85		8.85		93.14
666		c2		423.83		8.42		91.68
667		h		422.84		7.99		91.43
668		h		424.13		9.21		90.97
669		h		423.18		9.74		93.11
670		h		422.78		7.08		93.59
671		h		422.88		8.13		95.04
672		h		423.12		5.31		94.94
673		h		425.17		1.46		95.61
674		h		426.66		50.78		95.49
675		h		427.75		8.58		94.26
676		c2		431.17		0.2		95.11
677		c2		432.03		0.27		96.37
678		c3		433.36		50.57		96.31
679		h		433.89		50.64		95.35
680		h		434.11		50.71		97.11
681		h		432.35		1.31		96.6
682		h		431.5		50.84		97.21
683		h		430.98		50.18		94.92
684		o		424.77		7.36		91.52
685		c2		424.49		6.67		90.3
686		c2		425.84		6.02		90.02
687		c1		426.3		5.21		91.23
688		c2		425.36		4.06		91.57
689		h		424.54		3.85		90.86
690		h		424.76		4.19		92.49
691		h		426.5		5.87		92.1
692		h		425.77		5.3		89.18
693		h		426.51		6.87		89.77
694		h		423.62		5.99		90.39
695		h		424.15		7.28		89.44
696		cp		430.01		0.04		90.32
697		cp		428.79		50.86		90.83
698		cp		430.48		1.3		90.29
699		cp		431.35		47.97		87.93
700		cp		431.84		46.93		87.22
701		cp		431.85		45.73		87.82
702		cp		427.92		0.78		91.2
703		cp		429.62		2.28		90.6
704		cp		428.37		2.04		91.04
705		cp		428.35		49.6		91.05
706		cp		426.72		0.52		91.74
707		cp		425.88		1.57		91.89
708		c5		426.25		2.85		91.71
709		c5		427.54		3.09		91.23
710		h		432.87		49.35		89.9
711		cp		429.05		48.59		90.49
712		cp		430.17		48.85		89.78
713		cp		426.37		50.33		92.13
714		cp		427.21		49.37		91.72
715		cp		428.59		47.34		90.68
716		cp		427.64		47.05		91.6
717		cp		426.95		48.1		92.09
718		cp		430.64		47.81		89.06
719		cp		430.39		46.55		89.44
720		cp		429.32		46.31		90.23
721		c2		427.38		45.76		92.33
722		h		426.29		45.55		92.29
723		h		427.6		45.78		93.42
724		cp		430.75		50.06		89.85
725		h		426.37		47.61		92.86
726		h		429.94		3.32		90.61
727		h		424.81		1.43		92.04
728		c2		425.13		50.05		92.96
729		c3		424.02		49.52		92.04
730		h		423.24		48.88		92.5
731		h		424.66		50.96		93.39
732		c1		428.09		44.57		91.69
733		o		427.1		43.54		91.69
734		c2		426.85		42.67		90.59
735		c2		426.18		41.4		91.09
736		c2		427.03		40.33		91.77
737		h		427.53		39.75		90.97
738		h		426.26		39.66		92.19
739		h		425.35		41.65		91.78
740		h		425.65		40.98		90.21
741		h		427.78		42.36		90.08
742		h		426.17		43.2		89.89
743		cp		433.65		46.81		91.49
744		cp		434.4		45.74		91.78
745		c5		435.98		44.75		93.26
746		cs		436.56		44.97		94.48
747		c5		435.06		45.75		92.95
748		cs		434.92		46.79		93.82
749		sp		436.04		46.48		95.08
750		cp		436.32		43.71		92.47
751		cp		437.08		42.78		93.07
752		c2		437.26		41.39		92.49
753		h		438.09		40.81		92.94
754		h		437.59		41.41		91.44
755		c1		435.99		40.55		92.69
756		c1		433.62		39.21		93.25
757		c2		432.11		39.08		93.1
758		c3		432.82		44.92		96.6
759		c2		432.04		45.58		95.47
760		cp		426.23		43.66		95.29
761		cp		425.5		42.62		94.86
762		cp		427.36		41.58		93.86
763		cp		426.07		41.57		94.24
764		cp		427.92		40.84		92.88
765		cp		425.73		44.83		95.73
766		c5		426.6		45.74		96.19
767		c5		427.97		45.53		96.09
768		c5		428.63		46.71		96.39
769		c5		426.5		47.06		96.61
770		np		427.72		47.68		96.76
771		c2		425.11		47.64		96.71
772		c1		424.33		46.97		95.58
773		c2		422.98		47.64		95.37
774		c3		422.08		47.51		96.6
775		h		422.53		47.9		97.53
776		h		421.81		46.45		96.76
777		h		422.36		47.15		94.59
778		h		424.58		47.31		97.63
779		h		425.14		48.74		96.54
780		hn		428.06		48.59		97.09
781		h		425.48		40.69		94.02
782		cp		430.55		45.56		95.71
783		h		423.07		48.65		94.91
784		h		425.02		47.25		94.76
785		h		432.36		45.35		94.44
786		h		432.29		46.65		95.37
787		h		432.61		43.83		96.65
788		h		432.86		45.37		97.6
789		h		431.54		38.98		94.05
790		h		433.15		49.48		96.33
791		cp		437.56		44.15		94.87
792		cp		437.65		42.95		94.28
793		cp		439.33		5.61		91.58
794		cp		434.07		47.8		93.57
795		cp		433.4		47.76		92.41
796		h		432.79		48.61		92.14
797		h		434.09		48.63		94.27
798		h		438.4		5.32		89.77
799		cp		428.47		44.42		95.52
800		cp		427.56		43.52		95.14
801		cp		428.13		42.48		94.51
802		cp		429.46		42.48		94.39
803		c5		429.25		40.76		92.72
804		c5		430		41.56		93.57
805		cp		430.34		43.41		94.81
806		cp		429.8		44.5		95.38
807		h		431.38		43.3		94.57
808		c2		424.05		42.3		95.16
809		c2		423.8		42.11		96.66
810		c3		422.33		41.99		97.02
811		h		421.91		41.13		96.46
812		h		421.85		42.92		96.65
813		h		422.07		41.85		98.09
814		h		424.29		41.16		96.97
815		h		423.68		41.35		94.74
816		h		446.9		43.47		95.64
817		h		433.07		46.88		90.58
818		h		432.43		50.66		88.65
819		o		431.5		44.38		89.56
820		c2		431.84		44.22		90.93
821		c2		433.25		43.7		91.21
822		c1		434.46		44.55		90.85
823		h		434.42		44.9		89.8
824		h		433.3		42.68		90.78
825		h		433.37		43.51		92.29
826		h		431.52		45.12		91.49
827		h		431.21		43.46		91.45
828		h		446.12		42.61		94.34
829		h		445.35		43.65		92.31
830		cp		438.24		2.21		93.38
831		h		437.45		2.7		92.83
832		h		437.22		6.54		96.86
833		h		445.6		46.83		96.74
834		h		431.97		38.15		92.52
835		h		423.63		50.28		91.35
836		h		425.26		49.29		93.75
837		h		428.95		44.25		92.3
838		h		434.38		8.67		96.04
839		h		424.33		42.88		97.25
840		h		423.37		43.11		94.82
841		c2		438.52		44.75		95.87
842		c1		439.83		43.96		95.77
843		c1		439.32		42.57		96.15
844		c2		438.64		41.99		94.91
845		h		438.67		45.78		95.49
846		h		438.1		44.79		96.89
847		h		440.18		44.14		94.74
848		h		438.52		42.6		96.91
849		h		439.36		41.81		94.09
850		h		438.13		41.04		95.16
851		c2		435.89		39.13		92.13
852		c2		434.02		40.56		93.85
853		c2		434.39		38.89		91.98
854		h		433.93		38.35		93.87
855		h		436.31		38.45		92.89
856		h		436.49		38.91		91.23
857		h		433.49		40.6		94.82
858		h		433.66		41.46		93.33
859		h		434.39		37.82		91.69
860		h		434.08		39.5		91.11
861		h		435.29		41.09		92.03
862		c2		440.96		44.27		96.75
863		c2		440.56		41.88		96.71
864		c1		441.68		42.93		96.72
865		h		441.65		45.03		96.35
866		h		440.61		44.46		97.78
867		h		440.76		40.93		96.19
868		h		440.52		41.57		97.77
869		h		442.34		42.62		97.55
870		o'		444.6		41.94		96.63
871		h		445.71		44.76		97.1
872		h		443.85		44.66		97.14
873		cp		429.95		46.67		96.14
874		h		430.46		47.55		96.51
875		o		431.32		41.27		93.34
876		c2		436.28		5.2		91.38
877		h		436.77		4.46		90.73
878		h		435.37		5.5		90.83
879		c3		439.98		9.59		96.36
880		h		439.63		8.98		97.21
881		h		439.86		10.68		96.44
882		h		441.08		9.45		96.41
883		c1		431.5		40.26		92.35
884		h		432.21		40.65		91.61
885		o		435.43		40.71		93.99
886		h		421.15		48.08		96.48
887		c1		432.63		0.4		90.46
888		c2		434.1		0.83		90.47
889		c1		431.9		1.6		89.88
890		c2		432.59		2.75		90.62
891		c1		434.02		2.29		90.9
892		h		432.41		0.3		91.54
893		h		434.61		0.16		91.19
894		h		434.62		0.71		89.5
895		h		431.98		1.81		88.79
896		h		432		2.91		91.54
897		h		432.5		3.69		90.05
898		h		434.61		2.8		90.12
899		c3		437.92		1.1		90.75
900		h		437.59		0.27		90.09
901		h		438		1.97		90.06
902		h		437.01		1.3		91.34
903		o		435.84		4.57		92.59
904		c2		434.49		4.11		92.63
905		c2		434.39		2.62		92.34
906		h		434.1		4.3		93.65
907		h		433.92		4.75		91.94
908		h		435.34		2.15		92.67
909		h		433.64		2.05		92.92
910		h		424.48		48.75		91.38
911		c2		428.58		44.99		90.3
912		h		429.12		44.14		89.86
913		h		427.71		44.97		89.62
914		c2		430.62		3.05		95.13
915		h		430.76		3.43		96.16
916		h		431.63		2.71		94.84
917		c1		429.88		7.08		94.75
918		h		430.05		7.83		93.95
919		c2		441.88		5.7		94.22
920		h		442.75		6.08		93.65
921		h		442.02		5.99		95.28
922		h		433.85		44.96		96.2
923		c2		444.73		47.06		90.22
924		h		444.29		46.25		89.62
925		h		445.65		47.46		89.73
926		c2		427.63		4.55		90.87
927		h		428.52		5.03		91.32
928		h		427.82		4.61		89.78
929		o		441.39		1.28		95.68
930		c3		446.67		49.24		94.46
931		h		447.52		48.68		94.02
932		h		446.39		48.75		95.41
933		h		447.17		50.19		94.71
934		c2		425.19		9.34		93.67
935		h		425.85		9.8		92.91
936		h		425.04		9.99		94.56
937		c2		435.76		43.77		91.06
938		h		436.55		44.01		90.32
939		h		435.52		42.77		90.67
940		c2		429.8		8.1		95.89
941		c2		430.99		9.05		95.8
942		h		429.79		7.54		96.84
943		h		428.86		8.66		96.04
944		h		430.86		9.87		96.52
945		h		431.03		9.46		94.77
946		c2		424.35		45.45		95.68
947		h		423.7		45.04		94.88
948		h		423.73		45.2		96.57
949		c2		430.12		39.98		91.76
950		h		429.79		38.93		91.62
951		h		430.02		40.39		90.74
952		h		431.76		0.39		94.19
953		oh		435.5		6.56		94.99
954		o'		434.39		5.75		96.85
955		ho		436.34		6.36		94.58
956		cp		441.19		4.27		92.01
957		h		439.8		3.6		89.08
958		c2		432.24		50.22		89.64
959		cp		431.1		45.53		88.92
960		h		432.3		44.93		87.25
961		h		432.22		47.03		86.21
962		h		431.36		48.95		87.49
963		cp		316.87		48.12		91.43
964		cp		317.92		48.53		92.15
965		cp		316.55		49.04		94
966		cp		317.74		48.99		93.39
967		cp		318.78		49.54		94.04
968		cp		316.41		49.47		95.25
969		c5		319.16		48.42		91.65
970		c5		320.26		48.91		92.34
971		cp		317.46		50.01		95.88
972		cp		318.66		50.02		95.28
973		cp		320.01		49.49		93.52
974		cp		321.06		50		94.18
975		cp		319.71		50.43		96
976		cp		320.93		50.44		95.44
977		cp		315.69		48.07		92.07
978		c5		321.36		48.6		91.56
979		c5		319.6		47.89		90.45
980		np		320.98		47.91		90.43
981		hn		321.54		47.63		89.62
982		cp		315.52		48.55		93.3
983		h		319.6		50.67		97.04
984		h		317.32		50.18		96.94
985		h		322.03		50.1		93.73
986		h		316.89		47.72		90.43
987		h		322.36		48.76		91.94
988		h		318.91		47.62		89.67
989		h		314.87		47.71		91.46
990		c2		314.18		48.36		93.98
991		c2		314.38		48.22		95.48
992		c1		315.09		49.48		95.97
993		c2		321.98		0.17		96.19
994		c2		322.65		1.07		95.15
995		c2		323.55		1.99		95.98
996		h		323.34		0.6		94.43
997		h		322.8		50.61		96.61
998		h		321.49		0.75		96.98
999		h		315.19		49.39		97.07
1000		h		313.39		48.01		95.94
1001		h		314.94		47.3		95.72
1002		h		313.63		47.48		93.6
1003		h		313.55		49.24		93.78
1004		cp		317.52		1.35		91
1005		cp		316.17		1.37		91.14
1006		cp		315.37		1.32		90.05
1007		cp		315.62		1.51		92.36
1008		cp		316.4		1.84		93.42
1009		cp		317.73		1.99		93.23
1010		cp		318.3		1.64		92.06
1011		cp		314.03		1.2		90.13
1012		cp		314.27		1.43		92.45
1013		cp		313.49		1.26		91.36
1014		cp		311.72		1.11		92.77
1015		cp		313.69		1.52		93.66
1016		cp		315.91		1.25		88.82
1017		cp		313.22		1.08		89.06
1018		cp		311.88		1.1		89.21
1019		cp		311.33		1.12		90.43
1020		cp		312.16		1.15		91.5
1021		h		310.74		0.93		93.2
1022		cp		315.72		2.08		94.57
1023		cp		314.39		1.89		94.76
1024		cp		317.24		1.35		88.66
1025		np		312.45		1.28		93.78
1026		cp		318.02		1.33		89.75
1027		h		319.08		1.43		89.53
1028		c2		313.69		1.79		96.1
1029		c2		314.19		0.48		96.72
1030		h		313.54		0.19		97.57
1031		h		315.2		0.52		97.17
1032		h		313.77		2.67		96.76
1033		h		312.59		1.82		96.22
1034		o		314.21		50.56		95.68
1035		cp		313.76		1.12		87.84
1036		cp		312.97		1.09		86.75
1037		cp		311.64		0.94		86.83
1038		c2		310.72		0.53		85.71
1039		c2		309.77		1.64		85.26
1040		c2		310.4		2.7		84.36
1041		c'		309.32		3.58		83.77
1042		h		311.05		3.38		84.95
1043		h		309.02		1.06		84.69
1044		h		309.12		2.01		86.07
1045		h		310.18		50.69		86.08
1046		h		311.3		0.1		84.87
1047		h		313.36		0.98		85.75
1048		c2		317.76		1.32		87.24
1049		c2		319.21		1.73		86.99
1050		c2		319.59		3.21		86.99
1051		o		320.18		3.49		88.26
1052		c1		320		4.77		88.86
1053		c2		321.19		4.94		89.8
1054		cp		319.83		6.15		91.57
1055		h		322.04		5.23		89.16
1056		h		321.4		3.99		90.32
1057		h		320.06		5.54		88.07
1058		h		318.69		3.79		86.73
1059		h		320.23		3.47		86.13
1060		h		319.55		1.31		86.03
1061		h		319.88		1.18		87.68
1062		h		317.13		1.98		86.61
1063		h		317.63		0.27		86.91
1064		c2		318.59		2.68		94.28
1065		c1		317.68		3.3		95.35
1066		c2		318.43		3.72		96.61
1067		h		318.96		2.82		96.95
1068		h		317.76		4.07		97.41
1069		h		317.07		4.14		94.96
1070		h		319.27		3.47		93.92
1071		h		319.31		2.03		94.81
1072		c2		321.69		3.66		96.58
1073		c2		319.3		4.95		96.36
1074		s		320.85		4.79		95.45
1075		h		319.47		5.48		97.31
1076		c1		323.04		3.43		95.92
1077		c'		324.1		4.21		96.68
1078		c2		323.93		5.71		96.89
1079		h		324.86		5.99		97.4
1080		h		323.11		5.93		97.6
1081		h		323.01		3.7		94.85
1082		cp		315.24		5.67		93.19
1083		cp		317.5		6.4		92.9
1084		cp		316.32		6.38		93.55
1085		cp		316.16		7.13		94.66
1086		cp		318.56		7.16		93.26
1087		c5		314.07		5.71		93.85
1088		c5		313.95		6.61		94.91
1089		cp		318.3		8		94.28
1090		cp		317.21		7.88		95.05
1091		cp		315.02		7.3		95.35
1092		cp		316.53		4.89		91.41
1093		c5		312.6		6.6		95.27
1094		c5		312.86		5.01		93.82
1095		np		311.9		5.61		94.6
1096		hn		310.88		5.49		94.61
1097		cp		317.59		5.61		91.81
1098		cp		318.72		5.55		91.09
1099		cp		322.13		6.53		91.32
1100		cp		322.07		7.33		92.39
1101		cp		320.92		7.43		93.09
1102		cp		315.32		5.1		91.97
1103		h		316.96		8.46		95.94
1104		h		314.88		8.03		96.13
1105		h		312.59		4.13		93.24
1106		h		323.06		6.32		90.82
1107		h		316.53		4.15		90.62
1108		c2		311.92		7.59		96.18
1109		c2		310.65		8.07		95.47
1110		c1		310.02		9.37		95.97
1111		c'		309.22		9.84		94.77
1112		o'		309.72		9.87		93.65
1113		c1		308.41		11.05		95.2
1114		c2		307.24		11.23		94.25
1115		c1		306.42		12.39		94.81
1116		h		305.83		12.76		93.95
1117		h		306.77		10.24		94.09
1118		h		307.63		11.53		93.26
1119		h		308		10.84		96.21
1120		h		309.26		9.17		96.75
1121		h		309.99		7.21		95.65
1122		h		312.57		8.4		96.56
1123		h		311.56		7.05		97.08
1124		cp		306.58		14.41		96.04
1125		cp		307.15		15.6		96.27
1126		cp		308.47		15.73		96.06
1127		cp		307.29		13.49		95.37
1128		cp		308.18		17.91		96.81
1129		cp		308.62		13.53		95.36
1130		cp		308.97		16.92		96.4
1131		cp		304.61		15.35		96.77
1132		cp		305.27		14.28		96.3
1133		cp		304.65		13.11		96.2
1134		cp		303.32		15.23		97.11
1135		cp		302.72		14.04		97.03
1136		cp		303.4		12.94		96.67
1137		cp		305.16		16.57		96.89
1138		h		301.71		14.01		97.4
1139		c5		310.3		17.03		96.43
1140		c5		311.11		16.05		95.87
1141		np		306.93		17.79		96.97
1142		cp		309.2		14.72		95.6
1143		cp		310.49		14.99		95.34
1144		cp		306.49		16.62		96.8
1145		c2		311.14		18.19		96.89
1146		c1		312.57		17.67		96.89
1147		c2		313.56		18.76		96.46
1148		h		313.5		19.16		95.43
1149		h		313.39		19.66		97.06
1150		h		312.86		17.26		97.87
1151		h		310.95		19.02		96.18
1152		h		310.81		18.54		97.89
1153		h		308.56		18.88		97.1
1154		h		304.62		17.47		97.14
1155		h		302.71		16.03		97.49
1156		h		311.08		14.27		94.8
1157		c2		302.68		11.63		96.87
1158		c2		301.82		11.39		95.63
1159		c3		300.4		11.38		96.19
1160		h		299.7		11.09		95.39
1161		h		300.35		10.62		96.98
1162		h		301.94		12.2		94.89
1163		h		302.17		10.46		95.16
1164		h		303.31		10.81		97.26
1165		o		314.85		18.29		96.84
1166		c2		315.76		19.36		97.04
1167		c2		316.13		19.98		95.69
1168		c1		316.26		18.87		94.66
1169		c2		316.57		19.4		93.26
1170		h		317.15		20.34		93.23
1171		h		315.72		19.39		92.56
1172		h		315.34		18.26		94.51
1173		h		315.43		20.79		95.4
1174		h		317.03		20.57		95.95
1175		h		315.47		20.1		97.82
1176		h		316.68		18.86		97.4
1177		cp		321.2		15.15		93.04
1178		cp		320.78		16.01		92.1
1179		cp		320.64		15.21		94.26
1180		cp		322.62		11.71		91.36
1181		cp		323.42		10.68		91.04
1182		cp		324.47		10.87		90.24
1183		cp		319.74		16.82		92.35
1184		cp		319.57		15.98		94.51
1185		cp		319.07		16.71		93.5
1186		cp		321.34		16.04		90.89
1187		cp		319.36		17.72		91.44
1188		cp		318.36		18.57		91.69
1189		c5		317.64		18.44		92.81
1190		c5		318.06		17.55		93.78
1191		h		323.61		12.77		93.56
1192		cp		322.18		15.05		90.56
1193		cp		322.37		14.03		91.41
1194		cp		320.17		17.97		90.39
1195		cp		321.02		17.01		90.01
1196		cp		322.7		15.01		89.32
1197		cp		322.28		15.9		88.41
1198		cp		321.5		16.93		88.76
1199		cp		322.89		12.92		90.87
1200		cp		323.76		13.01		89.86
1201		cp		323.47		13.98		88.98
1202		c2		322.65		15.66		86.96
1203		h		323.53		16.28		86.73
1204		h		321.86		16.07		86.3
1205		cp		322.13		14.25		92.71
1206		h		321.29		17.68		88
1207		h		319.11		16.03		95.48
1208		h		318.02		19.38		91.06
1209		c2		320.25		19.36		89.81
1210		c3		319.26		19.63		88.68
1211		h		318.25		19.27		88.97
1212		h		321.24		19.56		89.37
1213		c1		322.8		14.19		86.6
1214		o		323.02		14.02		85.2
1215		c2		323.76		12.88		84.76
1216		c2		323.06		11.57		85.1
1217		c2		324		10.45		84.67
1218		h		325.02		10.48		85.11
1219		h		324.18		10.54		83.58
1220		h		322.81		11.45		86.17
1221		h		322.13		11.65		84.51
1222		h		324.73		12.83		85.29
1223		h		323.88		13.02		83.67
1224		cp		327.8		15.59		92.83
1225		cp		327.87		14.25		92.81
1226		c5		327.47		12.2		93.95
1227		cs		326.71		11.69		94.97
1228		c5		327.38		13.59		93.86
1229		cs		326.55		14.21		94.75
1230		sp		325.95		12.99		95.79
1231		cp		328.24		11.41		93.19
1232		cp		328.18		10.08		93.4
1233		c2		329.03		9.14		92.57
1234		h		329.33		8.29		93.2
1235		h		330.04		9.56		92.44
1236		c1		328.36		8.63		91.29
1237		c1		326.54		6.93		89.66
1238		c2		326.03		7.81		88.53
1239		c3		324.44		2.13		84.86
1240		c2		322.92		2.16		85.02
1241		cp		321.49		7.18		81.89
1242		cp		321.31		8.52		82
1243		cp		322.61		8.49		83.95
1244		cp		321.96		9.16		82.99
1245		cp		323.35		9.1		84.89
1246		cp		321.29		6.49		80.75
1247		c5		321.44		5.16		80.68
1248		c5		321.78		4.57		81.89
1249		c5		321.79		3.19		81.71
1250		c5		321.33		4.11		79.77
1251		np		321.55		2.89		80.39
1252		c2		321.49		4.49		78.32
1253		c1		320.78		5.85		78.26
1254		c2		320.9		6.42		76.85
1255		c3		322.32		6.61		76.32
1256		h		322.99		7.14		77.03
1257		h		322.28		7.19		75.38
1258		h		320.33		7.36		76.74
1259		h		321.04		3.7		77.69
1260		h		322.56		4.54		78.06
1261		hn		321.54		1.95		79.97
1262		h		321.99		10.22		82.78
1263		cp		322.42		3.09		83.94
1264		h		320.35		5.74		76.17
1265		h		319.71		5.58		78.33
1266		h		322.56		2.42		86.03
1267		h		322.59		1.1		84.97
1268		h		324.68		1.56		83.94
1269		h		324.88		1.52		85.66
1270		h		326.56		7.46		87.62
1271		h		300.29		12.42		96.56
1272		cp		326.68		10.37		95.15
1273		cp		327.42		9.56		94.37
1274		cp		319.75		6.92		92.67
1275		cp		326.47		15.55		94.72
1276		cp		327.13		16.24		93.78
1277		h		326.95		17.3		93.67
1278		h		325.81		16.18		95.3
1279		h		321.09		7.9		94.04
1280		cp		322.14		5.19		83.03
1281		cp		321.98		6.52		82.95
1282		cp		322.57		7.14		84
1283		cp		323.05		6.5		85.09
1284		c5		323.75		8.5		86.03
1285		c5		323.59		7.12		86.15
1286		cp		322.99		5.15		85.1
1287		cp		322.54		4.42		84.06
1288		h		323.44		4.57		85.89
1289		c2		320.48		9.51		81.21
1290		c2		318.98		9.27		81.37
1291		c3		318.45		9.84		82.68
1292		h		318.53		10.94		82.79
1293		h		317.36		9.65		82.65
1294		h		318.79		9.3		83.59
1295		h		318.63		9.75		80.43
1296		h		320.66		9.5		80.12
1297		h		321.09		2.73		96.47
1298		h		328.19		16.15		91.99
1299		h		323.55		14.26		94.37
1300		o		326		12.24		89.33
1301		c2		326.78		12.17		90.53
1302		c2		327.77		13.33		90.49
1303		c1		328.62		13.48		91.75
1304		h		329.46		14.11		91.39
1305		h		327.35		14.3		90.16
1306		h		328.51		13.13		89.69
1307		h		326.18		12.19		91.45
1308		h		327.31		11.21		90.44
1309		h		321.76		4.01		97.62
1310		h		318.66		5.73		95.91
1311		cp		311.16		1.09		88.07
1312		h		310.08		1.03		88.13
1313		h		311.01		2.37		83.5
1314		h		321.88		1.71		94.69
1315		h		326.45		8.82		88.71
1316		h		319.21		20.7		88.4
1317		h		320.14		20.17		90.55
1318		h		321.85		13.65		86.81
1319		h		310.82		8.19		94.39
1320		h		318.83		8.18		81.31
1321		h		320.69		10.6		81.28
1322		c2		325.61		9.95		96.13
1323		c1		325.33		8.45		96.04
1324		c1		325.6		7.89		94.64
1325		c2		327.11		8.09		94.53
1326		h		325.82		10.32		97.15
1327		h		324.7		10.53		95.87
1328		h		326.03		8.01		96.77
1329		h		325.2		8.46		93.78
1330		h		327.61		7.76		95.46
1331		h		327.46		7.33		93.79
1332		c2		328.75		7.19		90.95
1333		c2		326.16		7.59		90.98
1334		c2		328.05		6.73		89.67
1335		h		326.12		5.91		89.59
1336		h		328.45		6.46		91.72
1337		h		329.84		7.17		90.78
1338		h		326.23		6.79		91.74
1339		h		325.07		7.78		90.89
1340		h		328.26		5.65		89.59
1341		h		328.54		7.39		88.92
1342		h		328.69		9.41		90.57
1343		c2		323.87		8.02		96.1
1344		c2		325.13		6.45		94.72
1345		c1		323.91		6.57		95.63
1346		h		323.46		8.19		97.12
1347		h		323.3		8.62		95.37
1348		h		325.74		5.72		95.3
1349		h		324.92		5.97		93.74
1350		h		322.96		6.39		95.09
1351		o'		324.87		3.56		97.39
1352		h		324.48		2		95.39
1353		h		323.7		1.57		96.99
1354		cp		322.06		2.46		82.81
1355		h		322.1		1.38		82.74
1356		o		324.13		6.85		87.39
1357		c2		319.05		9.22		94.79
1358		h		318.31		9.92		95.21
1359		h		319.64		9.8		94.06
1360		c3		314.18		4.68		91.06
1361		h		314.56		4.6		90.03
1362		h		313.4		5.47		91.04
1363		h		313.64		3.75		91.33
1364		c1		324.54		7.93		88.22
1365		h		323.88		8.09		89.1
1366		o		326.94		8.71		91.38
1367		h		322.73		5.6		76.16
1368		c1		321.94		13.08		94.92
1369		c2		322.37		12.55		96.28
1370		c1		321.23		14.35		95.35
1371		c2		320.23		13.79		96.37
1372		c1		320.95		12.52		96.84
1373		h		321.22		12.46		94.35
1374		h		322.91		11.59		96.2
1375		h		322.97		13.32		96.79
1376		h		321.93		15.05		95.85
1377		h		319.25		13.58		95.9
1378		h		319.95		14.44		97.21
1379		h		320.93		12.58		97.95
1380		c3		309.82		1.16		90.53
1381		h		309.49		0.92		91.56
1382		h		309.31		0.35		89.98
1383		h		309.5		2.19		90.3
1384		o		319.9		9.02		95.93
1385		c2		320.79		10.11		96.16
1386		c2		320		11.37		96.51
1387		h		321.54		9.94		96.95
1388		h		321.37		10.24		95.24
1389		h		319.5		11.65		95.57
1390		h		319.14		11.15		97.16
1391		h		319.49		19.03		87.78
1392		c2		323.89		13.7		87.55
1393		h		324.04		12.62		87.39
1394		h		324.9		14.16		87.48
1395		c2		305.49		11.89		95.9
1396		h		306.18		11.53		96.68
1397		h		304.8		11.08		95.61
1398		c1		309.37		12.23		95.21
1399		h		309.99		12.19		94.3
1400		c2		318.76		4.83		89.75
1401		h		318.68		3.77		90.06
1402		h		317.84		5.02		89.17
1403		h		324.94		3.12		84.85
1404		c2		316.55		2.37		95.8
1405		h		315.91		2.75		96.63
1406		h		317.14		1.52		96.19
1407		c2		317.33		17.86		95.06
1408		h		316.92		16.88		95.38
1409		h		318.09		18.29		95.74
1410		o		315.13		1.09		87.71
1411		c3		319.8		1.74		91.84
1412		h		320.15		2.62		91.28
1413		h		320.27		0.86		91.35
1414		h		320.44		1.76		92.74
1415		c2		312.53		16.55		95.85
1416		h		312.79		16.9		94.84
1417		h		313.24		15.75		96.12
1418		c2		329.17		12.16		92.27
1419		h		330.08		12.32		92.88
1420		h		329.52		11.59		91.39
1421		c2		310.08		11.91		96.52
1422		c2		310.81		10.57		96.49
1423		h		309.4		12.03		97.39
1424		h		310.86		12.64		96.82
1425		h		311.23		10.46		97.51
1426		h		311.66		10.68		95.79
1427		c2		321.06		6.92		79.31
1428		h		320.13		7.53		79.35
1429		h		321.85		7.67		79.08
1430		c2		324.27		9.12		87.3
1431		h		325.23		9.63		87.09
1432		h		323.54		9.84		87.69
1433		h		302.06		11.71		97.79
1434		oh		308.4		4.05		84.68
1435		o'		309.32		3.89		82.58
1436		ho		308.68		4		85.59
1437		cp		320.99		5.93		90.93
1438		h		322.94		7.86		92.75
1439		c2		322.89		13.56		93.82
1440		cp		324.69		12.06		89.67
1441		h		325.2		10.07		90.19
1442		h		323.18		9.7		91.43
1443		h		321.8		11.57		92.05
1444		cp		350.47		44.02		91.53
1445		cp		351.26		44.22		92.58
1446		cp		352.91		44.91		91.11
1447		cp		352.54		44.53		92.34
1448		cp		353.5		44.4		93.26
1449		cp		354.14		45.37		90.87
1450		c5		350.92		43.82		93.81
1451		c5		351.88		43.73		94.8
1452		cp		355.05		45.28		91.85
1453		cp		354.74		44.85		93.08
1454		cp		353.14		44.05		94.5
1455		cp		353.99		44.07		95.53
1456		cp		355.67		44.8		94.04
1457		cp		355.25		44.44		95.26
1458		cp		350.87		44.25		90.27
1459		c5		351.35		43.13		95.94
1460		c5		349.77		43.33		94.41
1461		np		350		42.93		95.72
1462		hn		349.24		42.64		96.33
1463		cp		352.13		44.64		90.06
1464		h		356.64		45.2		93.81
1465		h		356.1		45.55		91.81
1466		h		353.74		43.69		96.51
1467		h		349.48		43.62		91.71
1468		h		352.02		42.78		96.71
1469		h		348.8		43.38		93.95
1470		h		350.16		44.24		89.47
1471		c2		352.58		44.85		88.63
1472		c2		353.69		45.88		88.43
1473		c1		354.73		45.76		89.54
1474		c2		356.37		44.2		96.24
1475		c2		356.66		42.7		96.23
1476		c2		356.82		41.87		94.96
1477		h		357.61		42.72		96.8
1478		h		356.09		44.56		97.25
1479		h		357.29		44.7		95.89
1480		h		355.4		46.62		89.74
1481		h		354.03		45.83		87.38
1482		h		353.28		46.91		88.48
1483		h		351.77		45.01		87.9
1484		h		353.09		43.92		88.34
1485		cp		363.55		44.3		86.98
1486		cp		362.86		45.44		87.18
1487		cp		363.22		46.56		86.54
1488		cp		361.69		45.4		87.83
1489		cp		361.23		44.25		88.35
1490		cp		362.05		43.18		88.37
1491		cp		363.22		43.24		87.73
1492		cp		362.44		47.66		86.58
1493		cp		360.9		46.49		87.83
1494		cp		361.24		47.61		87.17
1495		cp		359.33		48.55		87.95
1496		cp		359.72		46.42		88.47
1497		cp		364.28		46.53		85.72
1498		cp		362.73		48.72		85.8
1499		cp		361.9		49.77		85.79
1500		cp		360.76		49.79		86.52
1501		cp		360.43		48.68		87.2
1502		h		358.56		49.31		87.95
1503		cp		360.01		44.18		88.92
1504		cp		359.25		45.29		89.01
1505		cp		364.78		45.34		85.37
1506		np		359.01		47.46		88.5
1507		cp		364.45		44.19		85.99
1508		h		364.89		43.32		85.53
1509		c2		357.87		45.31		89.62
1510		c2		356.77		45.07		88.58
1511		h		357.07		44.26		87.89
1512		h		356.47		45.88		87.88
1513		h		357.88		44.61		90.47
1514		h		357.69		46.28		90.13
1515		o		355.5		44.66		89.07
1516		cp		363.89		48.75		85.13
1517		cp		364.23		49.8		84.36
1518		cp		363.36		50.83		84.28
1519		c2		363.69		0.85		83.27
1520		c2		364.89		1.72		83.63
1521		c2		364.85		3.18		83.18
1522		c'		365.96		3.94		83.88
1523		h		365.01		3.28		82.09
1524		h		364.89		1.69		84.73
1525		h		365.78		1.16		83.29
1526		h		362.78		1.47		83.14
1527		h		363.78		0.51		82.22
1528		h		365.2		49.83		83.89
1529		c2		365.61		45.21		84.11
1530		c2		364.78		44.81		82.9
1531		c2		365.29		45.18		81.5
1532		o		366.65		44.83		81.31
1533		c1		367.09		44.84		79.95
1534		c2		368.59		44.56		79.99
1535		cp		368.76		46.97		80.68
1536		h		368.9		44.58		78.93
1537		h		368.63		43.53		80.39
1538		h		366.69		44		79.36
1539		h		365.09		46.22		81.18
1540		h		364.59		44.73		80.78
1541		h		364.65		43.71		82.97
1542		h		363.74		45.14		83.01
1543		h		366.39		44.43		84.17
1544		h		366.19		46.14		83.95
1545		c2		361.58		41.87		88.96
1546		c1		360.38		41.94		89.92
1547		c2		359.93		40.49		90.08
1548		h		360.78		39.99		90.59
1549		h		359.87		39.95		89.12
1550		h		360.72		42.33		90.9
1551		h		362.37		41.21		89.36
1552		h		361.13		41.48		88.03
1553		c2		357.32		40.16		93.39
1554		c2		358.67		40.29		90.93
1555		s		358.43		41.22		92.45
1556		h		358.5		39.22		91.14
1557		c1		357.32		40.43		94.9
1558		c'		358.58		39.89		95.55
1559		c2		359.88		39.81		94.76
1560		h		359.87		39.71		93.66
1561		h		360.21		38.79		95.02
1562		h		356.46		40		95.44
1563		cp		366.65		0.15		79.31
1564		cp		367.96		49.56		80.39
1565		cp		367.59		50.83		80.19
1566		cp		368.24		0.75		80.85
1567		cp		368.94		49.26		81.27
1568		c5		366.26		1.43		79.34
1569		c5		366.91		2.39		80.1
1570		cp		369.39		50.18		82.14
1571		cp		369.11		0.39		81.79
1572		cp		368.01		2.07		80.78
1573		cp		366.6		48.95		78.69
1574		c5		366.46		3.66		79.77
1575		c5		365.24		2.18		78.77
1576		np		365.45		3.55		78.85
1577		hn		365		4.34		78.39
1578		cp		367.44		48.57		79.65
1579		cp		367.68		47.29		79.95
1580		cp		370.45		45.51		81.24
1581		cp		371.19		46.54		81.68
1582		cp		370.62		47.75		81.74
1583		cp		366.18		50.22		78.53
1584		h		369.42		1.22		82.41
1585		h		368.47		2.87		81.33
1586		h		364.54		1.84		78.02
1587		h		370.89		44.52		81.23
1588		h		366.32		48.24		77.92
1589		c2		367.12		4.91		80.32
1590		c2		366.33		6.19		80.12
1591		c1		366.45		7.13		81.31
1592		c'		365.98		8.54		81.02
1593		o'		365.78		8.85		79.84
1594		c1		366.12		9.58		82.12
1595		c2		365.65		10.93		81.57
1596		c1		365.62		12		82.66
1597		h		365.8		12.96		82.14
1598		h		364.65		10.79		81.12
1599		h		366.36		11.2		80.76
1600		h		365.45		9.2		82.92
1601		h		365.74		6.74		82.07
1602		h		365.24		6		80.1
1603		h		368.19		5.03		80.07
1604		h		367.23		4.77		81.41
1605		cp		366.56		12.61		84.84
1606		cp		367.58		12.71		85.7
1607		cp		368.6		11.84		85.61
1608		cp		366.58		11.77		83.8
1609		cp		369.58		12.99		87.39
1610		cp		367.53		10.81		83.78
1611		cp		369.64		12.05		86.44
1612		cp		365.43		14.1		86.19
1613		cp		365.44		13.3		85.12
1614		cp		364.29		13.19		84.43
1615		cp		364.34		14.79		86.58
1616		cp		363.23		14.76		85.82
1617		cp		363.22		13.93		84.77
1618		cp		366.54		14.44		86.87
1619		h		362.37		15.3		86.17
1620		c5		370.61		11.14		86.43
1621		c5		370.59		10.16		85.44
1622		np		368.66		13.85		87.31
1623		cp		368.54		10.91		84.65
1624		cp		369.64		10.15		84.5
1625		cp		367.62		13.67		86.63
1626		c2		371.94		11.2		87.14
1627		c1		372.48		9.8		86.86
1628		c2		373.97		9.88		86.55
1629		h		374.48		8.91		86.4
1630		h		374.23		10.34		85.58
1631		h		372.13		9.22		87.73
1632		h		372.52		12		86.67
1633		h		371.84		11.45		88.21
1634		h		370.33		13.1		88.16
1635		h		366.46		15.16		87.67
1636		h		364.35		15.36		87.49
1637		h		369.93		9.51		83.68
1638		c2		361.88		13.88		84.08
1639		c2		360.73		13.09		84.71
1640		c3		359.44		12.97		83.9
1641		h		358.94		13.92		83.67
1642		h		359.61		12.37		82.99
1643		h		361.03		12.03		84.79
1644		h		360.49		13.45		85.73
1645		h		361.5		14.89		83.84
1646		o		374.51		10.71		87.57
1647		c2		375.1		9.98		88.63
1648		c2		374.16		9.77		89.81
1649		c1		374.51		8.41		90.4
1650		c2		373.93		8.05		91.76
1651		h		373.69		8.9		92.44
1652		h		374.62		7.34		92.26
1653		h		375.61		8.38		90.5
1654		h		374.31		10.58		90.54
1655		h		373.1		9.71		89.47
1656		h		375.48		9.04		88.18
1657		h		376		10.48		89.03
1658		cp		369.42		4.97		88.57
1659		cp		369.36		5.6		89.76
1660		cp		370.56		5.11		87.89
1661		cp		367.31		1.47		88.27
1662		cp		366.43		0.54		87.86
1663		cp		365.26		0.42		88.51
1664		cp		370.42		6.28		90.22
1665		cp		371.64		5.82		88.27
1666		cp		371.54		6.4		89.48
1667		cp		368.28		5.38		90.52
1668		cp		370.37		6.85		91.44
1669		cp		371.45		7.38		92.03
1670		c5		372.6		7.46		91.34
1671		c5		372.6		7.04		90.01
1672		h		367.61		3.13		86.44
1673		cp		367.47		4.33		90.28
1674		cp		367.69		3.53		89.23
1675		cp		369.19		6.82		92.09
1676		cp		368.14		6.12		91.63
1677		cp		366.43		4.11		91.09
1678		cp		366.13		5.03		92.01
1679		cp		366.95		6.07		92.24
1680		cp		366.92		2.43		89.11
1681		cp		365.92		2.13		89.95
1682		cp		365.68		3		90.94
1683		c2		364.97		5.07		92.98
1684		h		364.09		5.53		92.49
1685		h		365.26		5.7		93.84
1686		cp		368.52		4.02		88.29
1687		h		366.66		6.89		92.87
1688		h		372.41		5.96		87.53
1689		h		371.6		7.94		92.94
1690		c2		369.05		7.49		93.44
1691		c3		369.36		6.42		94.48
1692		h		369.65		6.9		95.43
1693		h		368.09		8.01		93.6
1694		c1		364.86		3.57		93.24
1695		o		363.76		3.31		94.11
1696		c2		363.85		3.94		95.39
1697		c2		363.16		3.14		96.49
1698		c2		363.97		1.94		96.97
1699		h		363.4		1.64		97.87
1700		h		364.91		2.33		97.4
1701		h		362.99		3.7		97.43
1702		h		362.17		2.74		96.21
1703		h		363.3		4.89		95.37
1704		h		364.92		4.1		95.62
1705		cp		365.66		47.87		89.23
1706		cp		364.59		47.47		89.94
1707		c5		363.48		45.72		91.12
1708		cs		363.61		44.4		91.42
1709		c5		364.49		46.18		90.29
1710		cs		365.44		45.26		89.96
1711		sp		364.99		43.75		90.64
1712		cp		362.41		46.46		91.49
1713		cp		361.42		45.86		92.16
1714		c2		360.06		46.5		92.25
1715		h		359.17		45.86		92.14
1716		h		359.96		47.24		91.43
1717		c1		359.94		47.16		93.62
1718		c1		359.04		48.2		96.16
1719		c2		360.09		49.12		96.79
1720		c3		365.47		44.76		95.38
1721		c2		365.83		45.3		94
1722		cp		368.1		50.8		95.05
1723		cp		367.74		1		95.38
1724		cp		365.5		0.35		95.77
1725		cp		366.49		1.26		95.79
1726		cp		364.26		0.67		96.19
1727		cp		369.39		50.43		94.93
1728		c5		369.56		49.23		94.34
1729		c5		368.48		48.45		93.93
1730		c5		368.97		47.16		93.75
1731		c5		370.67		48.4		94.22
1732		np		370.35		47.13		93.78
1733		c2		371.88		48.9		94.96
1734		c1		372.03		50.4		94.73
1735		c2		373.36		50.9		95.3
1736		c3		373.4		0.25		96.77
1737		h		372.81		1.18		96.81
1738		h		374.38		0.59		97.14
1739		h		373.36		0.83		94.79
1740		h		372.79		48.41		94.56
1741		h		371.79		48.65		96.03
1742		hn		370.89		46.26		93.83
1743		h		366.35		2.32		95.98
1744		cp		366.75		46.5		93.93
1745		h		374.25		50.3		95.08
1746		h		372.11		50.57		93.64
1747		h		364.9		45.33		93.41
1748		h		366.23		44.37		93.54
1749		h		366.38		44.4		95.9
1750		h		364.8		43.9		95.22
1751		h		360.49		48.79		97.76
1752		h		358.71		12.43		84.53
1753		cp		362.7		43.84		92.22
1754		cp		361.67		44.61		92.6
1755		cp		369.39		48		81.25
1756		cp		366.41		45.62		89.11
1757		cp		366.51		46.92		88.8
1758		h		367.24		47.18		88.05
1759		h		367.13		44.92		88.72
1760		h		371.26		48.54		82.11
1761		cp		367.23		48.77		94.31
1762		cp		367.06		49.98		94.86
1763		cp		365.78		50.21		95.21
1764		cp		364.82		49.27		95.12
1765		c5		363.29		50.81		95.98
1766		c5		363.55		49.53		95.5
1767		cp		365.13		48.05		94.67
1768		cp		366.37		47.74		94.26
1769		h		364.34		47.3		94.61
1770		c2		368.63		2.22		95.45
1771		c2		369.22		2.7		96.77
1772		c3		370.38		3.64		96.49
1773		h		370.27		4		95.45
1774		h		370.47		4.43		97.25
1775		h		371.37		3.15		96.48
1776		h		368.39		3.19		97.31
1777		h		368.03		3.04		95.03
1778		h		357.66		39.11		93.27
1779		h		365.74		48.84		88.76
1780		h		368.18		4.81		86.27
1781		o		364.27		0.44		90.5
1782		c2		365.03		50.51		91.21
1783		c2		364.19		49.3		91.59
1784		c1		363.61		48.53		90.41
1785		h		363.28		49.11		89.53
1786		h		363.45		49.62		92.34
1787		h		364.88		48.57		92.07
1788		h		365.9		50.1		90.67
1789		h		365.44		50.93		92.15
1790		h		356.34		40.12		92.88
1791		h		357.77		40.6		90.37
1792		cp		362.26		50.82		85.04
1793		h		361.66		0.66		84.92
1794		h		363.89		3.69		83.41
1795		h		355.91		42.31		96.94
1796		h		359.59		50.01		97.2
1797		h		368.49		5.81		94.77
1798		h		369.77		8.31		93.59
1799		h		365.78		3.2		93.74
1800		h		366.54		6.76		79.19
1801		h		369.64		1.98		97.49
1802		h		369.43		2.15		94.68
1803		c2		363.1		42.46		92.71
1804		c1		361.96		41.71		93.39
1805		c1		361.49		42.82		94.33
1806		c2		360.74		43.89		93.54
1807		h		363.54		41.78		91.96
1808		h		363.89		42.6		93.47
1809		h		361.1		41.37		92.78
1810		h		362.26		43.39		94.88
1811		h		359.82		43.5		93.08
1812		h		360.53		44.64		94.31
1813		c2		359.13		48.45		93.55
1814		c2		359.58		46.79		95.91
1815		c2		358.43		48.75		94.88
1816		h		358.24		48.05		96.9
1817		h		358.45		48.21		92.71
1818		h		359.71		49.26		93.07
1819		h		359.1		46.03		96.55
1820		h		360.68		46.76		95.93
1821		h		357.42		48.33		94.75
1822		h		358.08		49.8		94.93
1823		h		360.88		47.49		94.1
1824		c2		362.23		40.59		94.39
1825		c2		360.62		42.07		95.34
1826		c1		361.04		40.6		95.35
1827		h		362.35		39.64		93.85
1828		h		363.09		40.91		95.01
1829		h		359.57		42.4		95.24
1830		h		360.88		42.55		96.3
1831		h		361.28		40.19		96.35
1832		o'		358.7		39.83		96.78
1833		h		357.49		42.43		94.28
1834		h		355.82		41.91		94.48
1835		cp		368.02		46.23		93.59
1836		h		368.39		45.22		93.46
1837		o		362.37		48.83		95.62
1838		c2		369.94		50.17		83.54
1839		h		370.08		49.11		83.85
1840		h		369.05		50.38		84.17
1841		c3		365.04		50.21		77.55
1842		h		365.18		49.73		76.56
1843		h		364.85		0.19		77.18
1844		h		364.07		49.84		77.93
1845		c1		361.21		49.62		95.87
1846		h		360.73		49.94		94.93
1847		o		359.23		46.38		94.59
1848		h		373.08		50.43		97.38
1849		c1		369.76		3.28		86.57
1850		c2		370.05		2.47		85.31
1851		c1		370.8		4.39		86.58
1852		c2		371.98		3.48		86.24
1853		c1		371.57		2.46		85.18
1854		h		369.96		2.75		87.52
1855		h		369.56		1.48		85.27
1856		h		369.64		2.97		84.41
1857		h		370.64		5.05		85.71
1858		h		372.3		3.09		87.23
1859		h		372.71		4.26		85.96
1860		h		371.99		2.63		84.17
1861		c3		359.87		51.01		86.54
1862		h		360.44		0.91		86.61
1863		h		359.08		0.31		87.24
1864		h		359.39		0.07		85.55
1865		o		371.05		51.02		83.77
1866		c2		371.56		50.86		85.09
1867		c2		372.19		1.12		85.56
1868		h		370.65		50.58		85.65
1869		h		372.36		50.09		85.15
1870		h		372.23		1		86.66
1871		h		373.26		1.12		85.3
1872		h		370.12		5.76		94.02
1873		c2		364.52		2.93		91.9
1874		h		364.16		1.93		92.2
1875		h		363.62		3.41		91.47
1876		c2		364.26		12.13		83.36
1877		h		364.04		11.12		83.75
1878		h		363.54		12.32		82.55
1879		c1		367.48		9.67		82.8
1880		h		368.21		9.96		82.02
1881		c2		366.9		46.19		79.26
1882		h		365.83		46.45		79.13
1883		h		367.23		46.13		78.2
1884		h		365.05		45.6		95.96
1885		c2		359.41		42.81		89.12
1886		h		358.42		42.84		89.6
1887		h		359.28		42.38		88.11
1888		c2		374.01		7.27		89.51
1889		h		374.57		6.32		89.61
1890		h		374.03		7.54		88.44
1891		o		364.77		47.7		85.2
1892		c3		364.1		42.01		87.76
1893		h		364.37		41.69		88.78
1894		h		365.12		42.09		87.35
1895		h		363.64		41.09		87.35
1896		c2		371.81		9.28		85.59
1897		h		372.43		9.43		84.68
1898		h		371.58		8.21		85.69
1899		c2		362.33		47.82		90.83
1900		h		361.77		47.68		89.88
1901		h		361.76		48.54		91.44
1902		c2		367.58		8.21		83.26
1903		c2		367.75		7.23		82.11
1904		h		366.72		7.96		83.91
1905		h		368.38		7.97		83.98
1906		h		367.85		6.22		82.56
1907		h		368.57		7.58		81.47
1908		c2		370.74		51.02		95.26
1909		h		371		0.98		94.9
1910		h		370.78		50.99		96.36
1911		c2		361.89		50.82		96.53
1912		h		361.9		50.58		97.61
1913		h		361.24		0.67		96.47
1914		h		362.05		13.53		83.04
1915		oh		365.7		5.24		84.23
1916		o'		367.03		3.37		84.05
1917		ho		366.56		5.66		84.39
1918		cp		369.23		45.72		80.73
1919		h		372.1		46.37		82.23
1920		c2		368.36		3.86		86.8
1921		cp		365.13		1.09		89.66
1922		h		364.63		50.65		88.22
1923		h		366.73		50.97		87.03
1924		h		368.27		1.4		87.79
1925		cp		394.68		40.09		90.6
1926		cp		395.13		40.66		91.74
1927		cp		394.82		38.59		92.77
1928		cp		395.31		39.84		92.79
1929		cp		395.97		40.29		93.88
1930		cp		394.97		37.85		93.89
1931		c5		395.46		41.96		91.81
1932		c5		396.13		42.42		92.94
1933		cp		395.68		38.3		94.94
1934		cp		396.31		39.48		94.9
1935		cp		396.41		41.56		93.93
1936		cp		397.18		41.99		94.94
1937		cp		396.92		39.97		95.99
1938		cp		397.51		41.17		95.95
1939		cp		394.29		38.81		90.61
1940		c5		396.36		43.79		92.79
1941		c5		395.3		43.06		90.98
1942		np		395.82		44.19		91.58
1943		hn		396.02		45.11		91.18
1944		cp		394.06		38.14		91.75
1945		h		397.1		39.22		96.76
1946		h		395.76		37.71		95.85
1947		h		397.58		43		94.88
1948		h		394.6		40.64		89.67
1949		h		397.08		44.38		93.35
1950		h		394.81		42.94		90.02
1951		h		394.07		38.39		89.64
1952		c2		393.11		36.96		91.74
1953		c2		392.93		36.5		93.19
1954		c1		394.28		36.5		93.9
1955		c2		398.29		41.65		97.15
1956		c2		399.64		42.32		96.92
1957		c2		400.52		41.52		95.97
1958		h		399.51		43.34		96.51
1959		h		397.65		42.35		97.73
1960		h		398.38		40.75		97.78
1961		h		394.87		35.77		93.3
1962		h		392.2		37.18		93.68
1963		h		392.29		35.6		93.13
1964		h		393.53		36.11		91.16
1965		h		392.14		37.11		91.24
1966		cp		399.18		30.41		94.05
1967		cp		397.89		30.11		94.24
1968		cp		397.46		28.86		94
1969		cp		397.14		31.07		94.81
1970		cp		397.53		32.34		94.94
1971		cp		398.85		32.57		94.8
1972		cp		399.69		31.58		94.48
1973		cp		396.21		28.53		94.34
1974		cp		395.89		30.7		95.14
1975		cp		395.45		29.44		94.98
1976		cp		393.55		30.14		95.91
1977		cp		395.15		31.69		95.68
1978		cp		398.31		27.97		93.46
1979		cp		395.72		27.29		94.17
1980		cp		394.57		26.93		94.75
1981		cp		393.84		27.81		95.45
1982		cp		394.25		29.09		95.45
1983		h		392.52		30.05		96.24
1984		cp		396.71		33.3		95.41
1985		cp		395.52		32.95		95.93
1986		cp		399.57		28.3		93.12
1987		np		393.99		31.32		96
1988		cp		399.99		29.52		93.46
1989		h		401.03		29.77		93.34
1990		c2		394.57		33.99		96.48
1991		c2		393.8		34.69		95.36
1992		h		392.73		34.54		95.59
1993		h		393.96		34.13		94.42
1994		h		393.88		33.65		97.27
1995		h		395.15		34.77		97.01
1996		o		394.15		36.07		95.26
1997		cp		396.57		26.4		93.64
1998		cp		396.12		25.14		93.51
1999		cp		394.94		24.79		94.04
[truncated: 67,265 more rows]
